# Supplementary material for: Spin rotation driven ferroelectric polarization with a 180° flop in double-perovskite Lu2CoMnO6
Source: Royal Society of Chemistry journal article supplement (doi:10.1039/c5ra03727a), 2015-01-01
Supplement: c5ra03727a1.pdf [file c5ra03727a1.pdf]

**Electronic Supplementary Information (ESI)**

# Spin Rotation Driven Ferroelectric Polarization 180° Flop in Double-Perovskite Lu<sub>2</sub>CoMnO<sub>6</sub>

Chao Xin,<sup>a</sup> Yu Sui,<sup>a,\*</sup> Yi Wang,<sup>b,\*</sup> Yang Wang,<sup>b</sup> Xianjie Wang,<sup>a</sup> Zhiguo Liu,<sup>a</sup> Bingsheng Li<sup>b</sup>  
and Xiaoyang Liu<sup>c</sup>

<sup>a</sup> *Department of Physics, Harbin Institute of Technology, Harbin 150001, People's Republic of China*

<sup>b</sup> *Natural Science Research Center, Academy of fundamental and Interdisciplinary Sciences, Harbin Institute of Technology, Harbin 150080, People's Republic of China*

<sup>c</sup> *State Key Laboratory of Inorganic Synthesis and Preparative Chemistry, College of Chemistry, Jilin University, Changchun 130012, People's Republic of China*

\*Corresponding Author.

Tel: +86-451-8641-8403; Fax: +86-451-8641-8403.

E-Mail: [suiyu@hit.edu.cn](mailto:suiyu@hit.edu.cn);

E-Mail: [yw@hit.edu.cn](mailto:yw@hit.edu.cn).

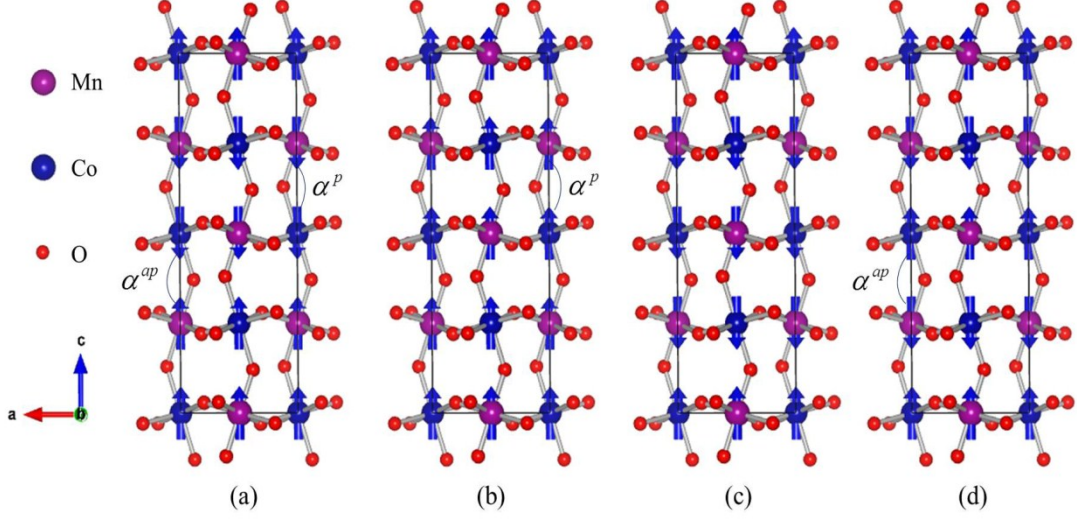

**FIG. ESI1.** Schematic diagram of the four collinear structures, (a) antiferromagnetic  $\uparrow\uparrow\downarrow\downarrow$ , (b) ferromagnetic  $\uparrow\uparrow\uparrow\uparrow$ , (c) ferrimagnetic  $\uparrow\downarrow\downarrow\downarrow$ , (d) A-type antiferromagnetic  $\uparrow\downarrow\downarrow\downarrow$  spin configuration. Blue arrows denote the direction of spins,  $\alpha^p$  and  $\alpha^{ap}$  indicate Co-O-Mn angle (in degrees) for parallel and antiparallel Co, Mn spins.

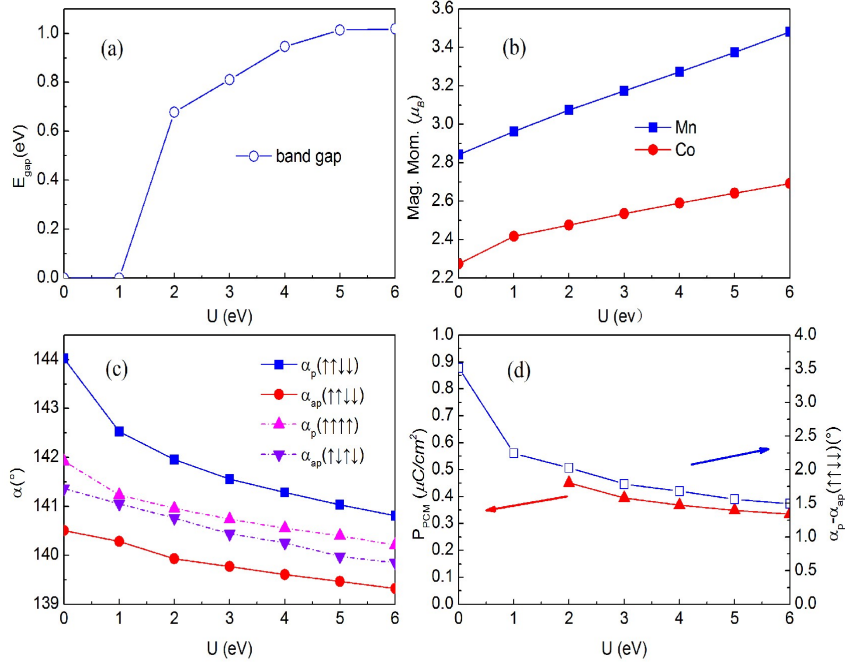

**FIG. ESI2.** The key electronic and structural parameters dependent on  $U$  for bulk  $\text{Lu}_2\text{CoMnO}_6$ . (a) Band gap. (b) Magnetic moments. (c) Co-O-Mn angles (in the unit of degrees)  $\alpha^p$  and  $\alpha^{ap}$  as defined in Fig. ESI1. (d)  $P_{PCM}$  and  $\alpha^p - \alpha^{ap}$  within AFM- $\uparrow\uparrow\downarrow\downarrow$  spin configuration.

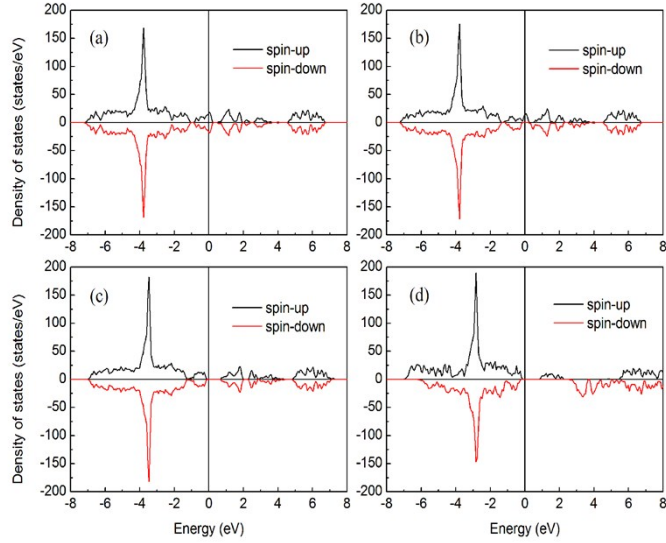

**FIG. ESI3.** Representative results for the electronic total density of states (DOS) close to the Fermi energy for bulk  $\text{Lu}_2\text{CoMnO}_6$  and various  $U$  values. (a)  $U_{\text{Co}} = U_{\text{Mn}} = 0$  eV for  $\uparrow\downarrow\uparrow\downarrow$ -type magnetic structure. (b)  $U_{\text{Co}} = U_{\text{Mn}} = 1$  eV for  $\uparrow\downarrow\uparrow\downarrow$ -type magnetic structure. (c)  $U_{\text{Co}} = U_{\text{Mn}} = 2$  eV for  $\uparrow\downarrow\uparrow\downarrow$ -type magnetic structure. (d)  $U_{\text{Co}} = U_{\text{Mn}} = 5$  eV for  $\uparrow\uparrow\uparrow\downarrow$ -type magnetic structure.

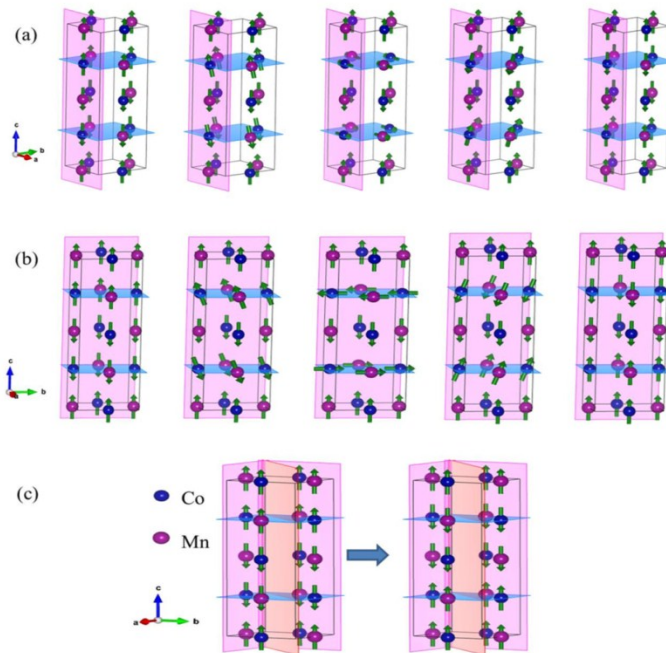

**FIG. ESI4.** (a) Spin rotation along  $ac$ -plane. (b) Spin rotation along  $bc$ -plane. (c) Any of the plane which through the  $c$ -axis. Green arrows denote the direction of spins, blue regions denote the layers of spin rotation, pink regions denote the planes of spin rotation, and the red regions denote the plane which through the  $c$ -axis.

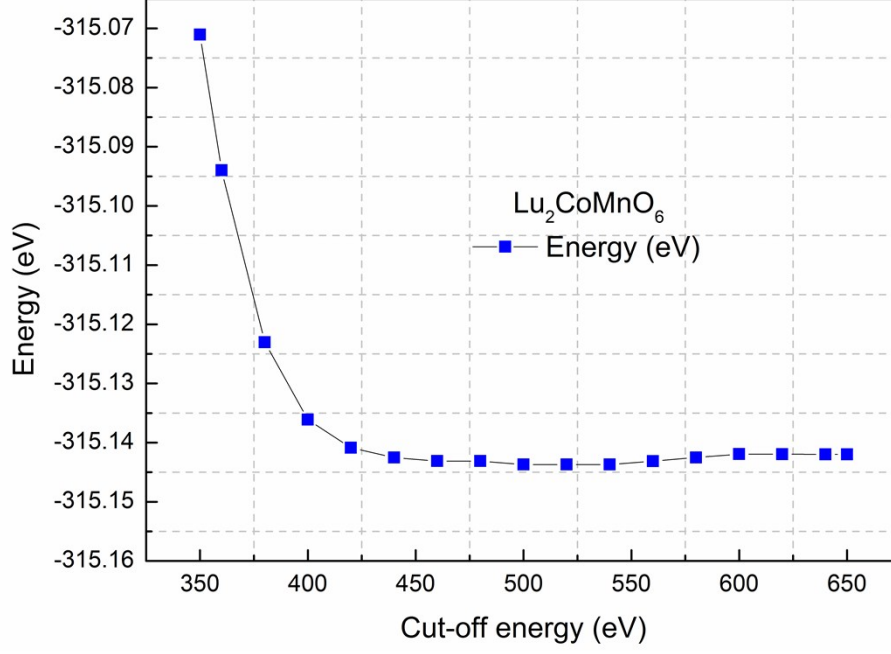

**FIG. ES15.** Total energy as a function of cut-off energy for  $\text{Lu}_2\text{CoMnO}_6$ .

**Table ES11.** Relative total energies achieved by the GGA+ $U$  calculation for four different spin configurations of double-perovskite  $\text{Lu}_2\text{CoMnO}_6$ .  $U_{\text{Mn}}$  and  $U_{\text{Co}}$  are the on-site repulsions for the atoms of Mn and Co, respectively. The energies of the  $\uparrow\uparrow\downarrow\downarrow$  magnetic configuration are set to zero as the reference energy.

| Magnetic ordering                      | Relative total energy (meV)     |                                 |                                 |                                 |                                 |                                 |                                 |
|----------------------------------------|---------------------------------|---------------------------------|---------------------------------|---------------------------------|---------------------------------|---------------------------------|---------------------------------|
|                                        | $U_{\text{Mn}}=U_{\text{Co}}=0$ | $U_{\text{Mn}}=U_{\text{Co}}=1$ | $U_{\text{Mn}}=U_{\text{Co}}=2$ | $U_{\text{Mn}}=U_{\text{Co}}=3$ | $U_{\text{Mn}}=U_{\text{Co}}=4$ | $U_{\text{Mn}}=U_{\text{Co}}=5$ | $U_{\text{Mn}}=U_{\text{Co}}=6$ |
| $\uparrow\uparrow\downarrow\downarrow$ | 0                               | 0                               | 0                               | 0                               | 0                               | 0                               | 0                               |
| $\uparrow\uparrow\uparrow\uparrow$     | -14.42                          | 79.49                           | 18.48                           | 5.02                            | -26.47                          | -46.36                          | -26.47                          |
| $\uparrow\downarrow\downarrow\uparrow$ | -96.88                          | 298.61                          | 40.29                           | 6.65                            | 25.05                           | 30.11                           | 25.053                          |
| $\uparrow\downarrow\uparrow\downarrow$ | -142.29                         | -29.04                          | 7.47                            | 38.34                           | 63.49                           | 83.98                           | 25.053                          |

**Table ESI2.** Comparison of atom positions of Lu<sub>2</sub>CoMnO<sub>6</sub> for our calculations and the experimental taken from Ref. 9.  $P2_1/n$  and  $P2_1$  are the high- and low-symmetry structure, respectively.

| Ion | GGA+ $U(P2_1)$ |          |          | GGA( $P2_1/n$ ) |          |          | Expt.( $P2_1/n$ ) <sup>a</sup> |          |          |
|-----|----------------|----------|----------|-----------------|----------|----------|--------------------------------|----------|----------|
|     | <i>x</i>       | <i>y</i> | <i>z</i> | <i>x</i>        | <i>y</i> | <i>z</i> | <i>x</i>                       | <i>y</i> | <i>z</i> |
| Lu1 | 0.5243         | 0.5776   | 0.2511   | 0.5261          | 0.5773   | 0.2513   | 0.5208                         | 0.5787   | 0.2499   |
| Lu2 | 0.4762         | 0.4222   | 0.3746   |                 |          |          |                                |          |          |
| Co1 | 0.0008         | 0.4994   | -0.0007  | 0               | 0.5      | 0        | 0                              | 0.5      | 0        |
| Co2 | 0.4992         | -0.0006  | 0.5014   |                 |          |          |                                |          |          |
| Mn1 | 0.4998         | -0.0002  | -0.0003  | 0.5             | 0        | 0        | 0.5                            | 0        | 0        |
| Mn2 | 0.0002         | 0.4998   | 0.5006   |                 |          |          |                                |          |          |
| O1  | 0.3821         | 0.9589   | 0.2438   | 0.3895          | 0.9653   | 0.2502   | 0.3841                         | 0.9585   | 0.2411   |
| O2  | 0.1181         | 0.4589   | 0.2562   |                 |          |          |                                |          |          |
| O3  | 0.1964         | 0.1843   | -0.0556  | 0.1851          | 0.1981   | -0.0558  | 0.1971                         | 0.1957   | -0.0575  |
| O4  | 0.3036         | 0.6843   | 0.5556   |                 |          |          |                                |          |          |
| O5  | 0.3224         | 0.7044   | -0.0617  | 0.3136          | 0.6916   | -0.0524  | 0.3228                         | 0.6953   | -0.0593  |
| O6  | 0.6218         | 0.0429   | 0.7568   |                 |          |          |                                |          |          |

**Table ESI3.** The calculated structural parameters compared to experimental data. FM is the structures of spin configurations ↑↑↑↑ in Fig. ESI1b.

|    | GGAP+ $U(P2_1/n)$              |          |          | Expt ( $P2_1/n$ )              |          |          |
|----|--------------------------------|----------|----------|--------------------------------|----------|----------|
|    | <i>x</i>                       | <i>y</i> | <i>z</i> | <i>x</i>                       | <i>y</i> | <i>z</i> |
|    | $a=5.1566, b=5.5339, c=7.4354$ |          |          | $a=5.1638, b=5.5467, c=7.4153$ |          |          |
| Lu | 0.5235                         | 0.5763   | 0.2514   | 0.5208                         | 0.5787   | 0.2499   |
| Co | 0                              | 0.5      | 0        | 0                              | 0.5      | 0        |
| Mn | 0.5                            | 0        | 0        | 0.5                            | 0        | 0        |
| O1 | 0.3797                         | 0.9564   | 0.2431   | 0.3841                         | 0.9585   | 0.2411   |
| O2 | 0.1970                         | 0.1857   | -0.0563  | 0.1971                         | 0.1957   | -0.0575  |
| O3 | 0.3209                         | 0.7042   | -0.0631  | 0.3228                         | 0.6953   | -0.0593  |

**Table ESI4.** Diagonal elements of the Born effective charges tensor for  $\uparrow\uparrow\downarrow\downarrow$ -antiferromagnetic  $\text{Lu}_2\text{CoMnO}_6$  in the ferroelectric  $P2_1$  phase.

| Ion | Nominal ionic Charge ( $e$ ) | $Z^*(e)$ |          |          |
|-----|------------------------------|----------|----------|----------|
|     |                              | $Z_{xx}$ | $Z_{yy}$ | $Z_{zz}$ |
| Lu1 | +3                           | 3.91     | 4.01     | 3.82     |
| Lu1 | +3                           | 4.01     | 4.02     | 3.71     |
| Co1 | +2                           | 2.02     | 2.53     | 2.15     |
| Co2 | +2                           | 2.23     | 2.43     | 2.31     |
| Mn1 | +4                           | 3.71     | 4.03     | 3.92     |
| Mn2 | +4                           | 3.76     | 4.06     | 3.92     |
| O1  | -2                           | -2.10    | -1.81    | -2.65    |
| O2  | -2                           | -2.11    | -1.81    | -2.55    |
| O3  | -2                           | -2.72    | -2.29    | -1.91    |
| O4  | -2                           | -2.73    | -2.32    | -1.96    |
| O5  | -2                           | -2.01    | -3.14    | -1.87    |
| O6  | -2                           | -1.98    | -3.14    | -1.91    |

The nature of bonding can further be correlated with the Born effective charge (BECs  $Z^*$ ). To calculate the BECs, we use density functional perturbation theory of the linear response formalism.<sup>S1</sup> Previous studies on many perovskite ferroelectrics show anomalously large BECs for some of the ions which are often explained as a manifestation of the strong covalent character of the bonds between the specific ions.<sup>S2, S3</sup> Table ESI4 summarizes the results of BECs of each ion along with their nominal charges. We observe that the Co/Mn ions have elements of BECs close to its nominal ionic charge, and the  $Z^*$  of Lu and O atoms are significantly anomalously large. We conclude that the bonds between Co/Mn and surrounding O ions are primarily ionic.

[S1] S. Baroni, S. de Gironcoli, A. D. Corso, and P. Giannozzi, *Rev. Mod. Phys.* **73**, 515 (2001).

[S2] P. Ghosez, X. Gonze, P. Lambin, and J. P. Michenaud, *Phys. Rev. B* **51**, 6765 (1995).

[S3] A. Roy, R. Prasad, S. Auluck, and A. Garg, *J. Phys.: Condens. Matter* **22**, 165902 (2010).

**Table ES15.** The detailed description of PAW potential used in our calculations, including version, ENMAX, ENMIN and valence electron for Lu, Co, Mn and O, respectively.

| Ions | Versions | ENMAX (eV) | ENMIN (eV) | Valence electron (n)           |
|------|----------|------------|------------|--------------------------------|
| Lu   | standard | 255.788    | 191.841    | $4f^{14}5s^25p^65d^16s^2$ (25) |
| Co   | standard | 267.969    | 200.977    | $3d^74s^2$ (9)                 |
| Mn   | Mn_pv    | 269.865    | 202.399    | $3p^63d^54s^2$ (13)            |
| O    | O_s      | 282.841    | 212.131    | $2s^22p^4$ (6)                 |
